# Supplementary material
Source: MDPI journal article supplement (https://www.mdpi.com/1996-1073/17/5/1096)
Supplement: s1 [file s1]

### Supplementary Material

In this paper, three topology design rules are derived from maximum power transmission capability (MPTC) results of more than 80 typical IDBS-MPET topologies. Limited by the length of this paper, only a few typical IDBS-MPET topologies and their MPTC calculation results are presented in the main body. The other IDBS-MPET topologies and their MPTC calculation results are listed in this supplementary material.

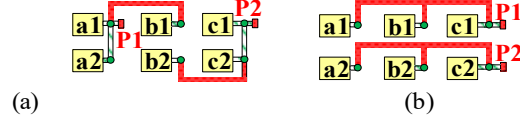

Fig. S1. IDBS-MPET of  $N(2)P(2)$ . (a)  $N(2)P(2)-D(2)(2,1)$ . (b)  $N(2)P(2)-T(2)(1,1,1)$ .

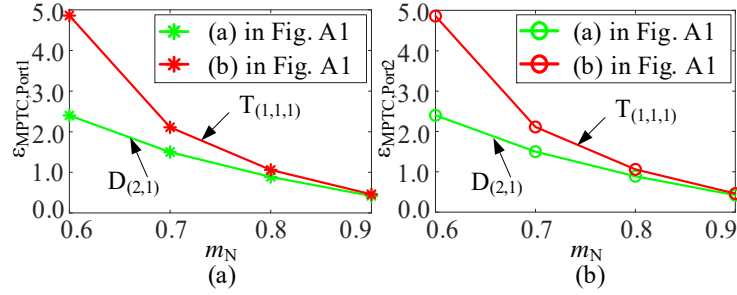

Fig. S2. MPTC of LVDC ports in MPETs shown in Fig. A1. (a) MPTC of Port1. (b) MPTC of Port2.

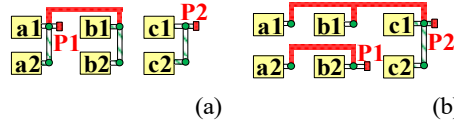

Fig. S3. IDBS-MPET of  $N(2)P(2)$ . (a)  $N(2)P(2)-S(1)(1)D(1)(2,2)$ . (b)  $N(2)P(2)-D(1)(1,1)T(1)(1,1,2)$ .

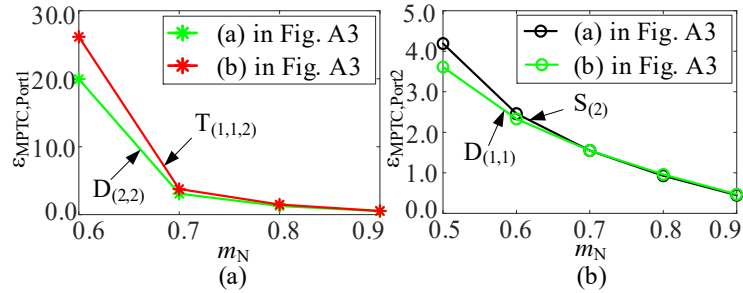

Fig. S4. MPTC of LVDC ports in MPETs shown in Fig. A3. (a) MPTC of Port1. (b) MPTC of Port2.

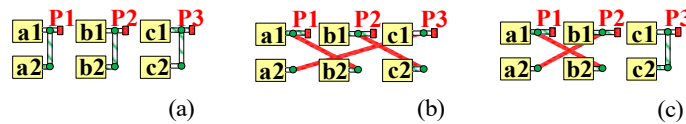

Fig. S5. IDBS-MPET of  $N(2)P(3)$ . (a)  $N(2)P(3)-S(3)(2)$ . (b)  $N(2)P(3)-D(3)(1,1)$ . (c)  $N(2)P(3)-S(1)(2)D(2)(1,1)$ .

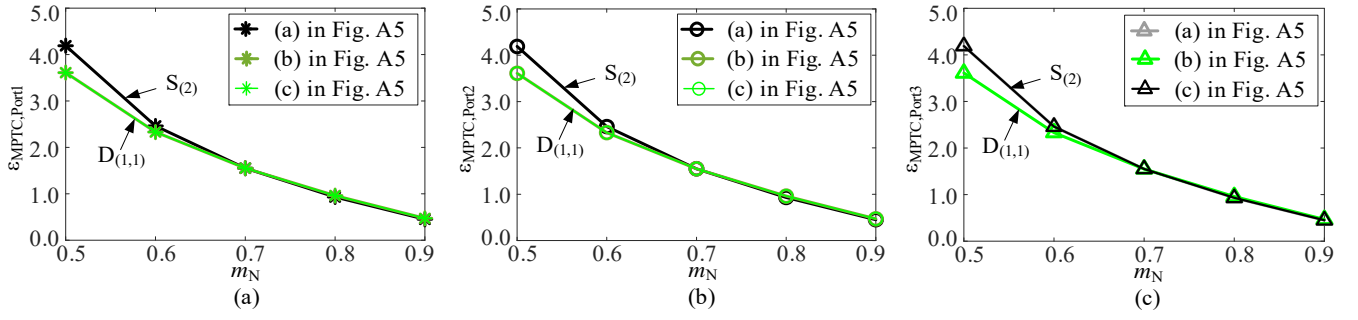

Fig. S6. MPTC of LVDC ports in MPETs shown in Fig. A5. (a) MPTC of Port1. (b) MPTC of Port2. (c) MPTC of Port3.

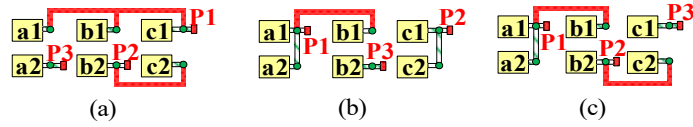

Fig. S7. IDBS-MPET of  $N_{(2)}P_{(3)}$ . (a)  $N_{(2)}P_{(3)}-S_{(1)(1)}D_{(1)(1,1)}T_{(1)(1,1,1)}$ . (b)  $N_{(2)}P_{(3)}-S_{(1)(1)}S_{(1)(2)}D_{(1)(2,1)}$ . (c)  $N_{(2)}P_{(3)}-S_{(1)(1)}D_{(1)(1,1)}D_{(1)(2,1)}$ .

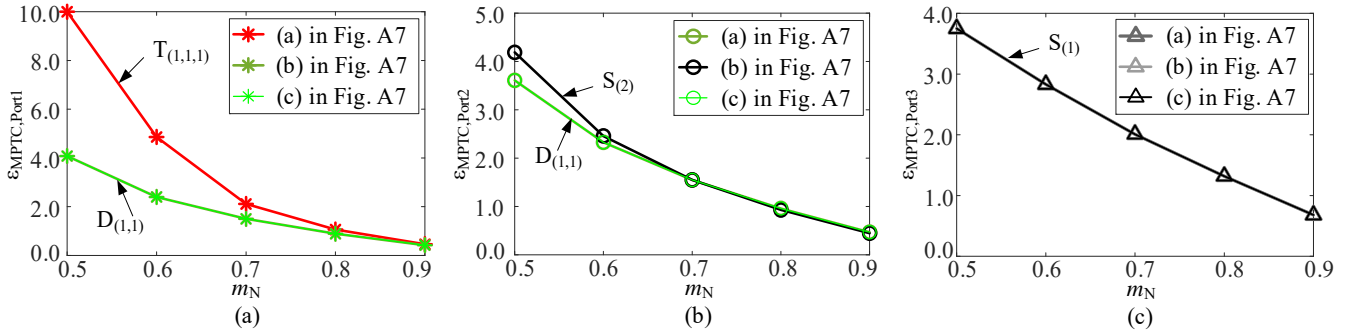

Fig. S8. MPTC of LVDC ports in MPETs shown in Fig. A7. (a) MPTC of Port1. (b) MPTC of Port2. (c) MPTC of Port3.

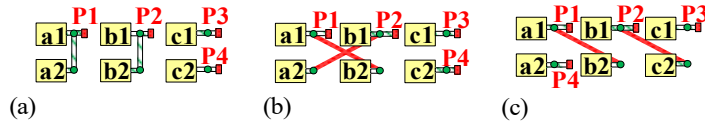

Fig. S9. IDBS-MPET of  $N_{(2)}P_{(4)}$ . (a)  $N_{(2)}P_{(4)}-S_{(2)(2)}S_{(2)(1)}$ . (b)  $N_{(2)}P_{(4)}-S_{(2)(1)}D_{(2)(1,1)}$ . (c)  $N_{(2)}P_{(4)}-S_{(2)(1)}D_{(2)(1,1)}$ .

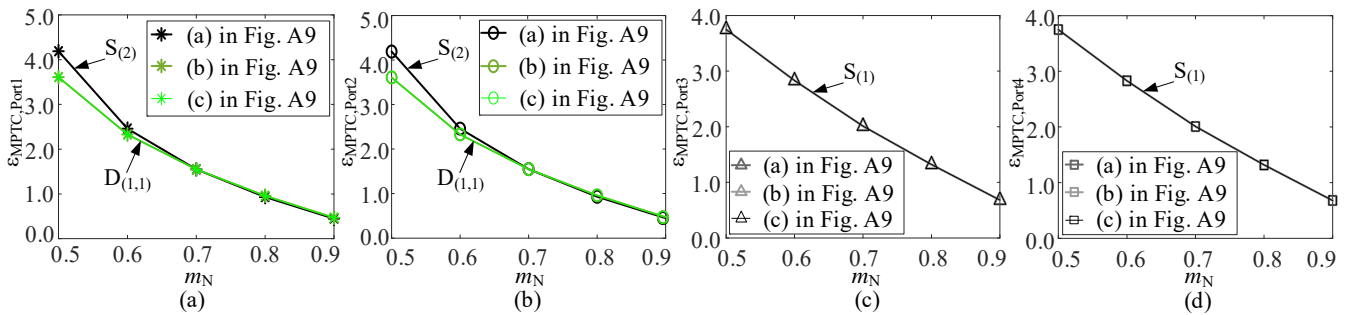

Fig. S10. MPTC of LVDC ports in MPETs shown in Fig. A9. (a) MPTC of Port1. (b) MPTC of Port2. (c) MPTC of Port3. (d) MPTC of Port4.

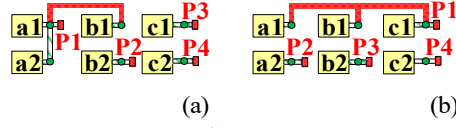

Fig. S11. IDBS-MPET of  $N(2)P(4)$ . (a)  $N(2)P(4)-S(3)(1)D(1)(2,1)$ . (b)  $N(2)P(4)-S(3)(1)T(1)(1,1,1)$ .

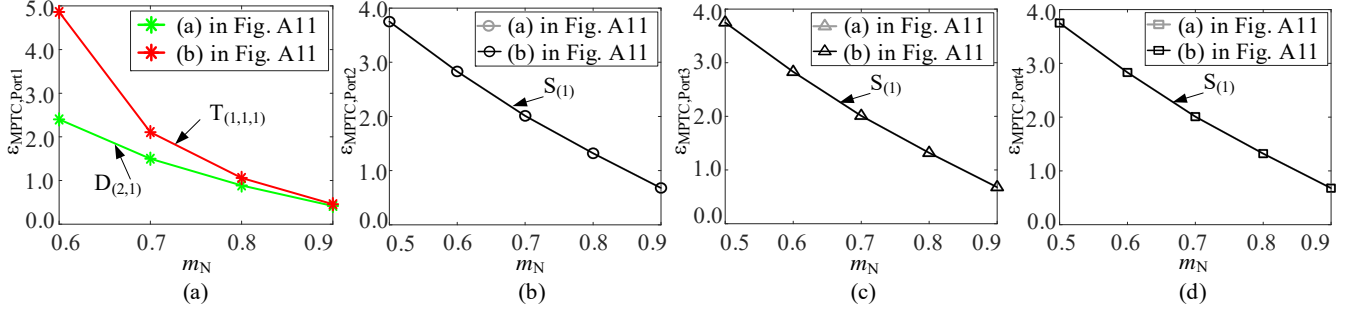

Fig. S12. MPTC of LVDC ports in MPETs shown in Fig. A11. (a) MPTC of Port1. (b) MPTC of Port2. (c) MPTC of Port3. (d) MPTC of Port4.

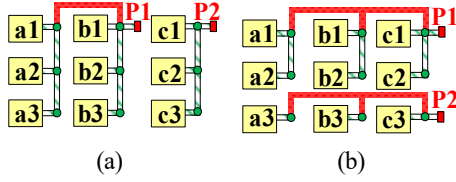

Fig. S13. IDBS-MPET of  $N(3)P(2)$ . (a)  $N(3)P(2)-S(1)(3)D(1)(3,3)$ . (b)  $N(3)P(2)-T(1)(2,2,2)T(1)(1,1,1)$ . (c)  $N(3)P(2)-D(1)(3,2)D(1)(3,1)$ . (d)  $N(3)P(2)-T(1)(2,2,1)T(1)(2,1,1)$ .

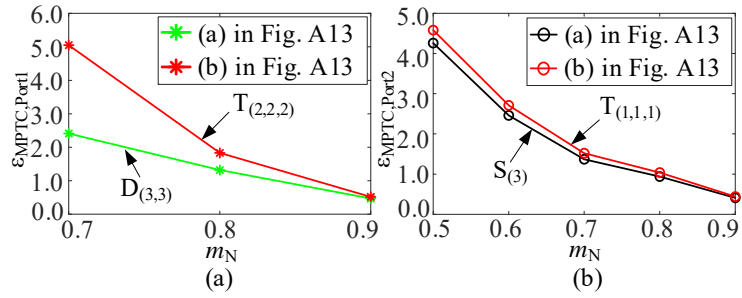

Fig. S14. MPTC of LVDC ports in MPETs shown in Fig. A13. (a) MPTC of Port1. (b) MPTC of Port2.

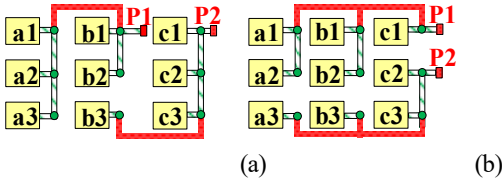

Fig. S15. IDBS-MPET of  $N(3)P(2)$ . (a)  $N(3)P(2)-D(1)(3,2)D(1)(3,1)$ . (b)  $N(3)P(2)-T(1)(2,2,1)T(1)(2,1,1)$ .

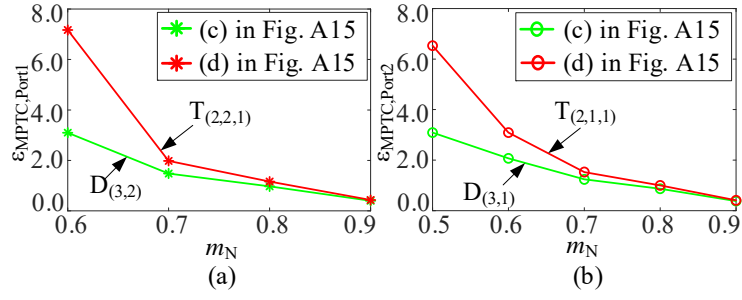

Fig. S16. MPTC of LVDC ports in MPETs shown in Fig. A15. (a) MPTC of Port1. (b) MPTC of Port2.

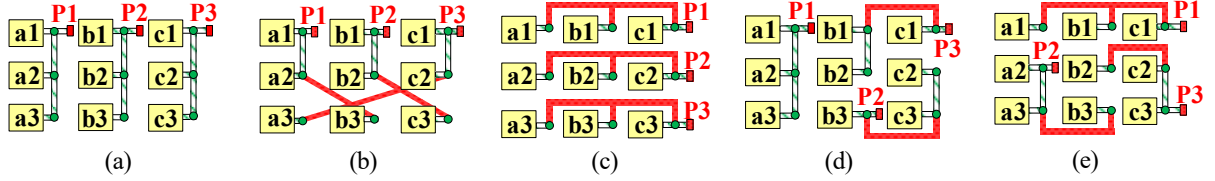

Fig. S17. IDBS-MPET of  $N(3)P(3)$ . (a)  $N(3)P(3)$ - $S(3(3))$ . (b)  $N(3)P(3)$ - $D(3(2,1))$ . (c)  $N(3)P(3)$ - $T(3(1,1,1))$ . (d)  $N(3)P(3)$ - $S(1(3))D(2(2,1))$ . (e)  $N(3)P(3)$ - $D(2(2,1))T(1(1,1,1))$ .

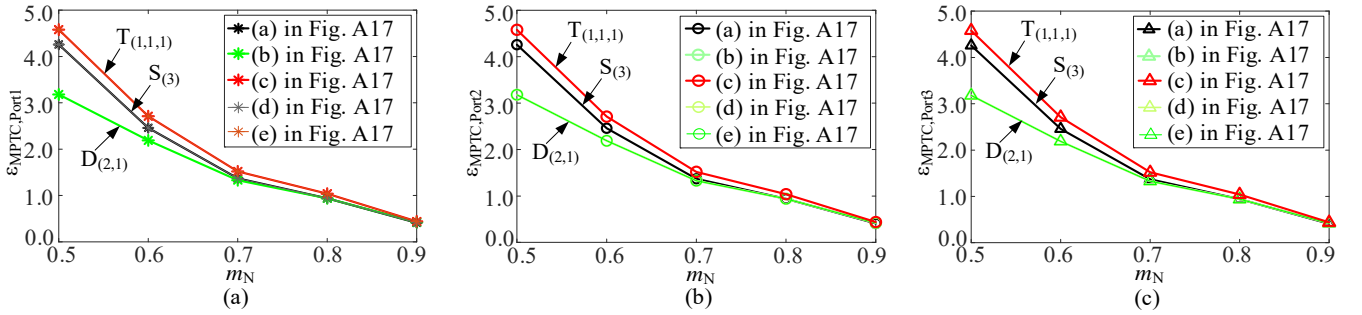

Fig. S18. MPTC of LVDC ports in MPETs shown in Fig. A17. (a) MPTC of Port1. (b) MPTC of Port2. (c) MPTC of Port3.

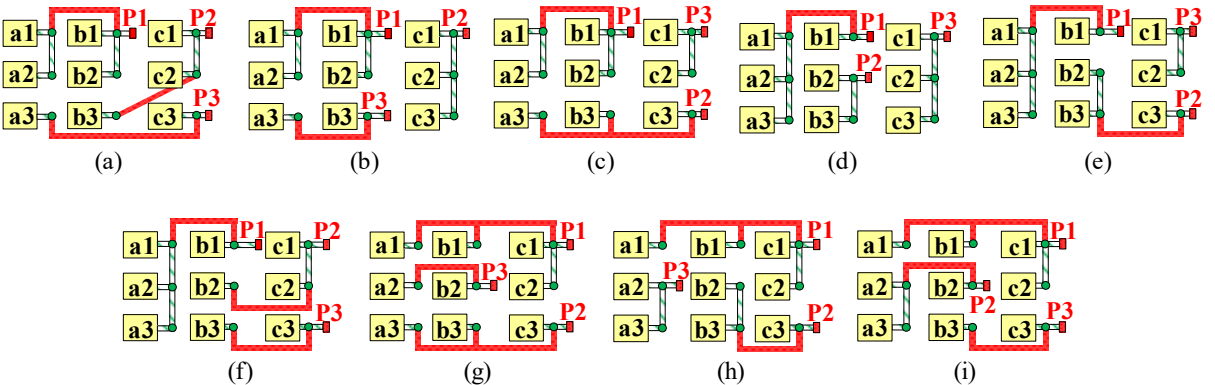

Fig. S19. IDBS-MPET of  $N(3)P(3)$ . (a)  $N(3)P(3)$ - $D(1(2,2))D(1(2,1))D(1(1,1))$ . (b)  $N(3)P(3)$ - $S(1(3))D(1(2,2))D(1(1,1))$ . (c)  $N(3)P(3)$ - $S(1(2))D(1(2,2))T(1(1,1,1))$ . (d)  $N(3)P(3)$ - $S(1(3))S(1(2))D(1(3,1))$ . (e)  $N(3)P(3)$ - $S(1(2))D(1(2,1))D(1(3,1))$ . (f)  $N(3)P(3)$ - $D(1(3,1))D(1(2,1))D(1(1,1))$ . (g)  $N(3)P(3)$ - $D(1(1,1))T(1(2,1,1))T(1(1,1,1))$ . (h)  $N(3)P(3)$ - $S(1(2))D(1(2,1))T(1(2,1,1))$ . (i)  $N(3)P(3)$ - $D(1(1,1))D(1(2,1))T(1(2,1,1))$ .

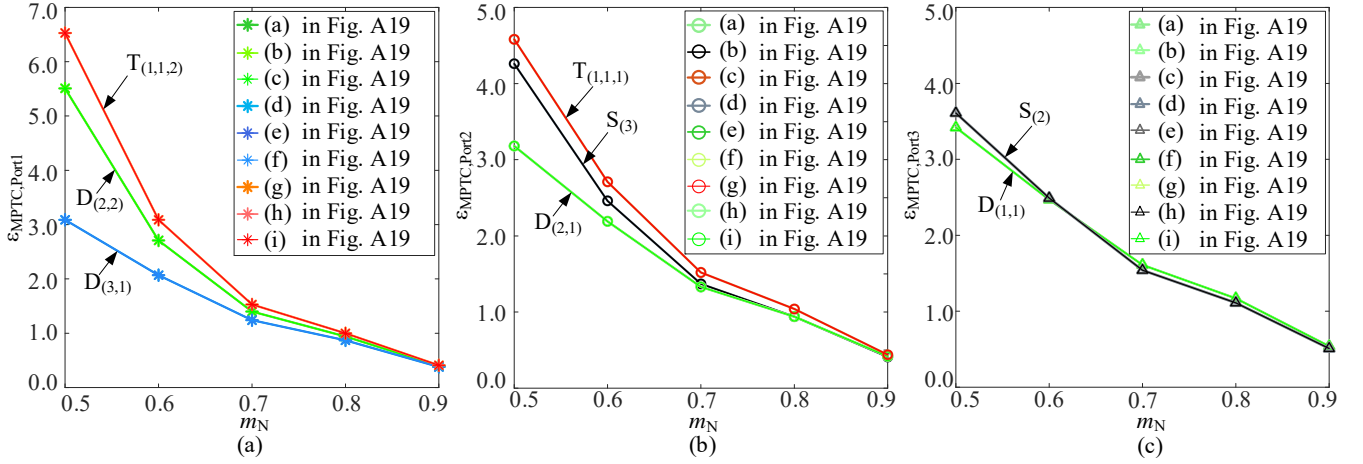

Fig. S20. MPTC of LVDC ports in MPETs shown in Fig. A19. (a) MPTC of Port1. (b) MPTC of Port2. (c) MPTC of Port3.

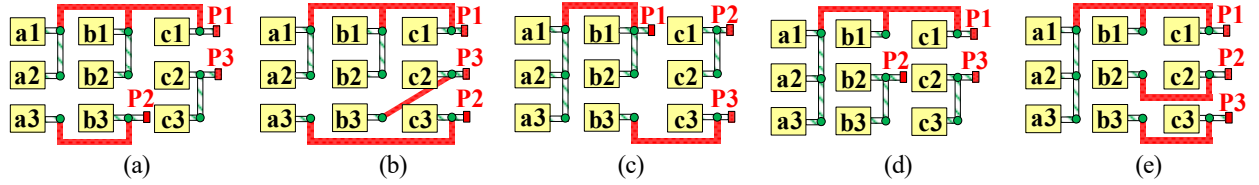

Fig. S21. IDBS-MPET of  $N(3)P(3)$ . (a)  $N(3)P(3)$ - $S(1)(2)D(1)(1,1)T(1)(2,2,1)$ . (b)  $N(3)P(3)$ - $D(2)(1,1)T(1)(2,2,1)$ . (c)  $N(3)P(3)$ - $S(1)(2)D(1)(3,2)D(1)(1,1)$ . (d)  $N(3)P(3)$ - $S(2)(2)T(1)(3,1,1)$ . (e)  $N(3)P(3)$ - $D(2)(1,1)T(1)(3,1,1)$ .

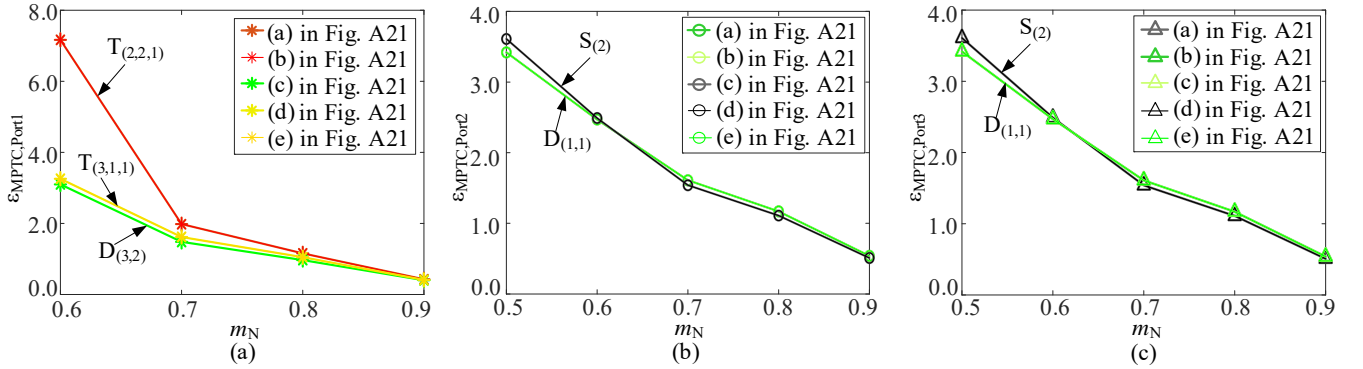

Fig. S22. MPTC of LVDC ports in MPETs shown in Fig. A21. (a) MPTC of Port1. (b) MPTC of Port2. (c) MPTC of Port3.

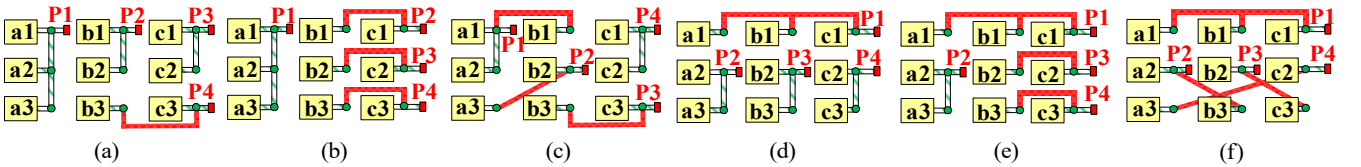

Fig. S23. IDBS-MPET of  $N(3)P(4)$ . (a)  $N(3)P(4)$ - $S(1)(3)S(2)(2)D(1)(1,1)$ . (b)  $N(3)P(4)$ - $S(1)(3)D(3)(1,1)$ . (c)  $N(3)P(4)$ - $S(1)(2)D(1)(2,1)D(2)(1,1)$ . (d)  $N(3)P(4)$ - $S(3)(2)T(1)(1,1,1)$ . (e)  $N(3)P(4)$ - $S(1)(2)D(2)(1,1)T(1)(1,1,1)$ . (f)  $N(3)P(4)$ - $D(3)(1,1)T(1)(1,1,1)$ .

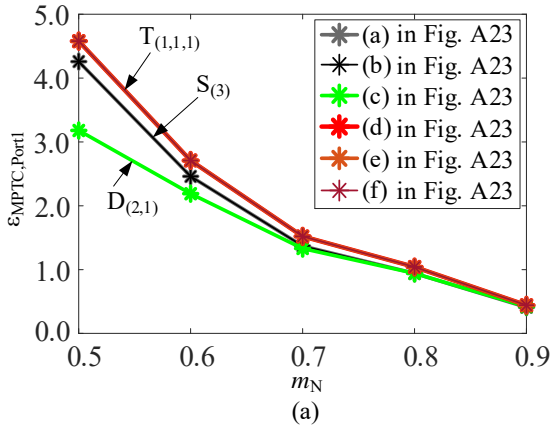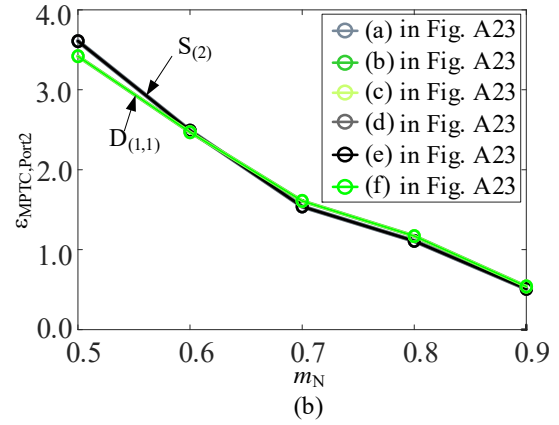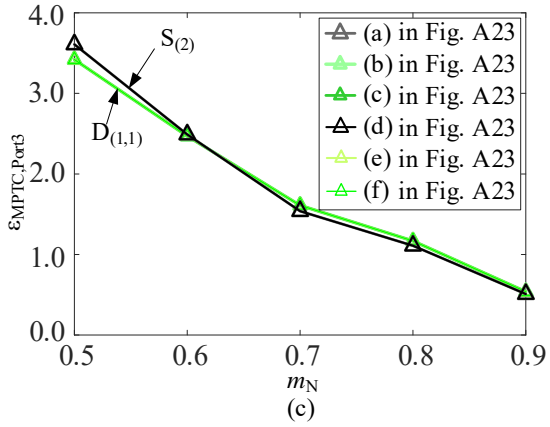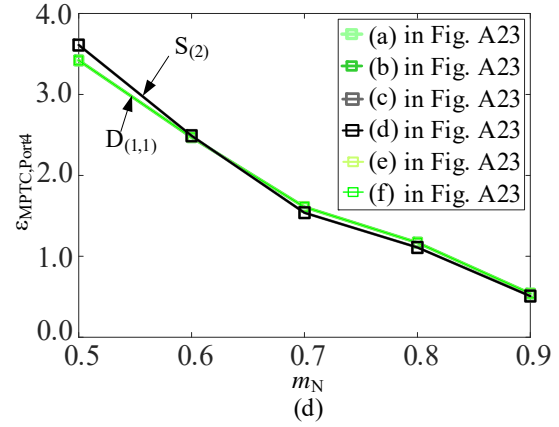

Fig. S24. MPTC of LVDC ports in MPETs shown in Fig. A23. (a) MPTC of Port1. (b) MPTC of Port2. (c) MPTC of Port3. (d) MPTC of Port4.

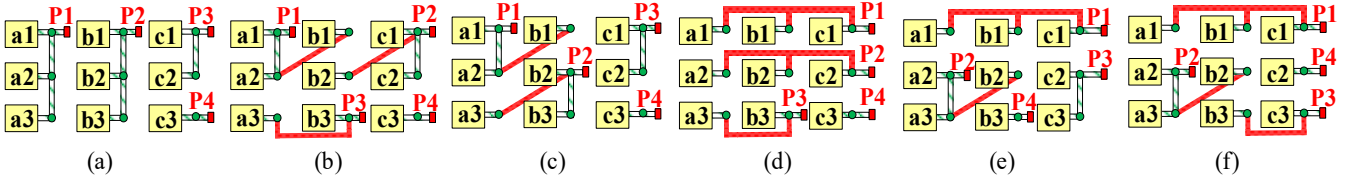

Fig. S25. IDBS-MPET of  $N_3P_4$ . (a)  $N_3P_4$ - $S_{(2)(3)}S_{(1)(2)}S_{(1)(1)}$ . (b)  $N_3P_4$ - $S_{(1)(1)}D_{(2)(2,1)}D_{(1)(1,1)}$ . (c)  $N_3P_4$ - $S_{(1)(2)}S_{(1)(1)}D_{(2)(2,1)}$ . (d)  $N_3P_4$ - $S_{(1)(1)}D_{(1)(1,1)}T_{(2)(1,1,1)}$ . (e)  $N_3P_4$ - $S_{(1)(1)}S_{(1)(2)}D_{(1)(2,1)}T_{(1)(1,1,1)}$ . (f)  $N_3P_4$ - $S_{(1)(1)}D_{(1)(2,1)}D_{(1)(1,1)}T_{(1)(1,1,1)}$ .

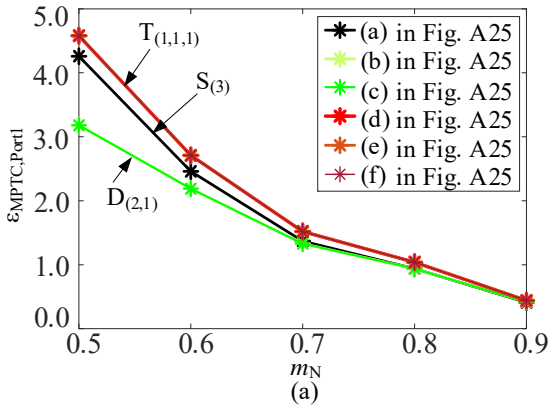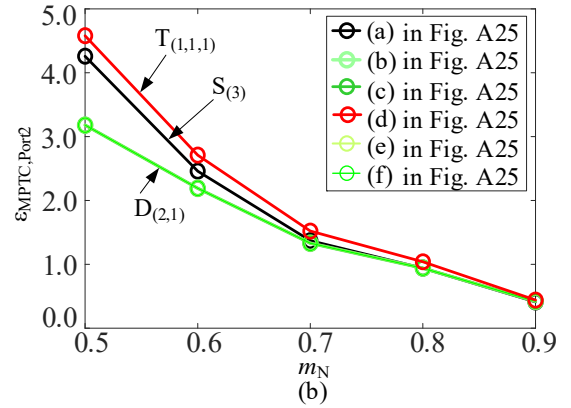

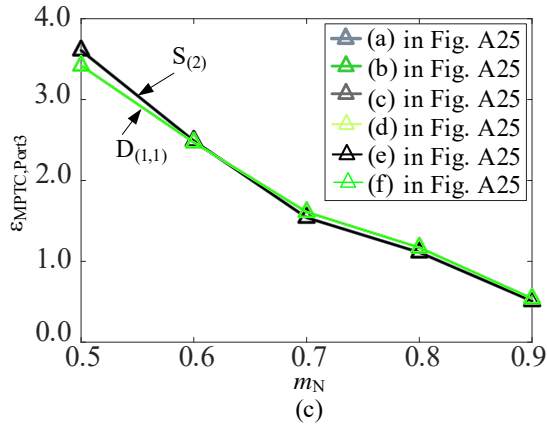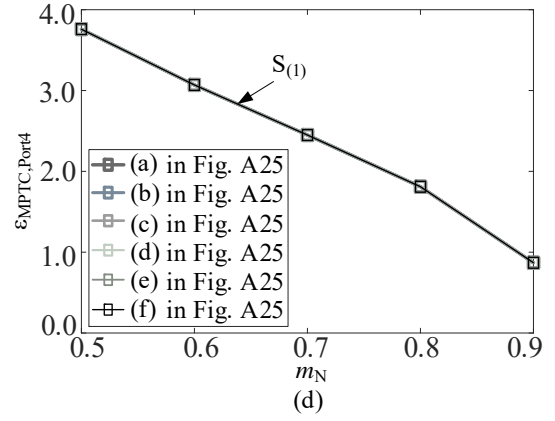

Fig. S26. MPTC of LVDC ports in MPETs shown in Fig. A25. (a) MPTC of Port1. (b) MPTC of Port2. (c) MPTC of Port3. (d) MPTC of Port4.

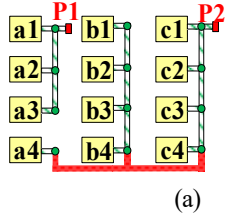

(a)

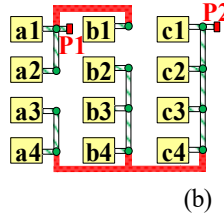

(b)

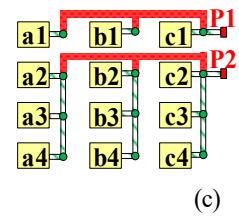

(c)

Fig. S27. IDBS-MPET of  $N_{(4)}P_{(2)}$ . (a)  $N_{(4)}P_{(2)}-S_{(1)(3)}T_{(1)(4,4,1)}$ . (b)  $N_{(4)}P_{(2)}-D_{(1)(2,1)}T_{(1)(2,3,4)}$ . (c)  $N_{(4)}P_{(2)}-T_{(1)(1,1,1)}T_{(1)(3,3,3)}$ .

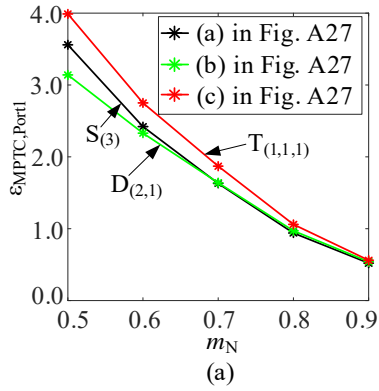

(a)

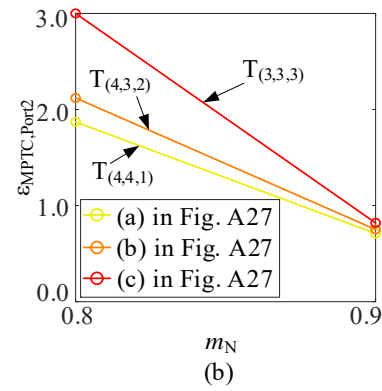

(b)

Fig. S28. MPTC of LVDC ports in MPETs shown in Fig. A27. (a) MPTC of Port1. (b) MPTC of Port2.

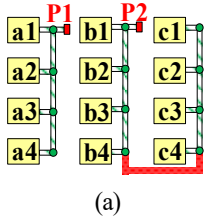

(a)

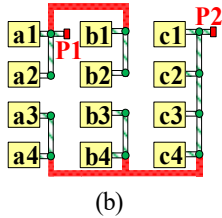

(b)

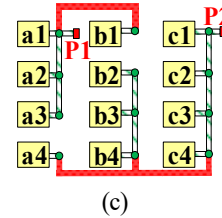

(c)

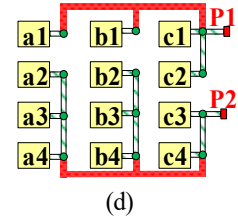

(d)

Fig. S29. IDBS-MPET of  $N_{(4)}P_{(2)}$ . (a)  $N_{(4)}P_{(2)}-S_{(1)(4)}D_{(1)(4,4)}$ . (b)  $N_{(4)}P_{(3)}-D_{(1)(2,2)}T_{(1)(2,2,4)}$ . (c)  $N_{(4)}P_{(3)}-D_{(1)(3,1)}T_{(1)(1,3,4)}$ . (d)  $N_{(4)}P_{(3)}-T_{(1)(1,1,2)}T_{(1)(3,3,2)}$ .

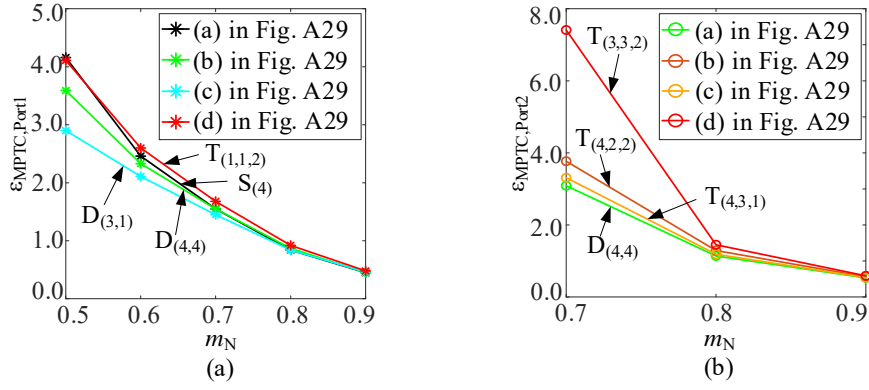

Fig. S30. MPTC of LVDC ports in MPETs shown in Fig. A29. (a) MPTC of Port1. (b) MPTC of Port2.

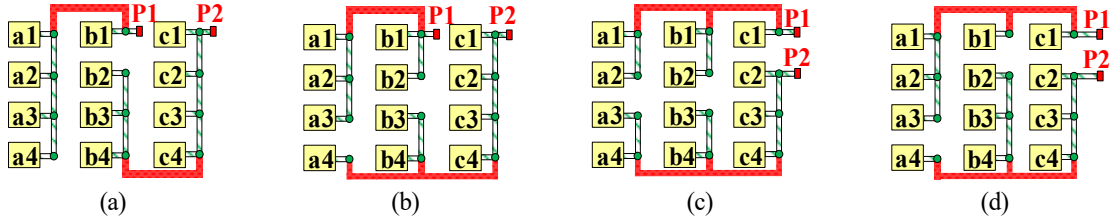

Fig. S31. IDBS-MPET of  $N(4)P(2)$ . (a)  $N(4)P(2)$ - $D(1)(4,1)D(1)(4,3)$ . (b)  $N(4)P(2)$ - $D(1)(3,2)T(1)(1,2,4)$ . (c)  $N(4)P(2)$ - $T(1)(2,2,1)T(1)(2,2,3)$ . (d)  $N(4)P(2)$ - $T(1)(3,1,1)T(1)(1,3,3)$ .

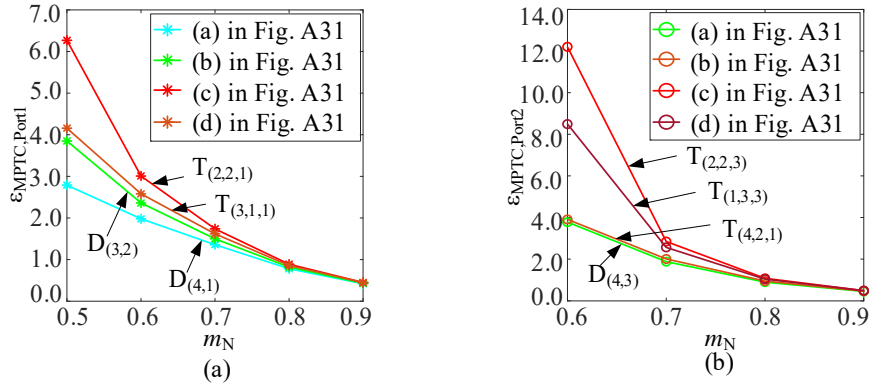

Fig. S32. MPTC of LVDC ports in MPETs shown in Fig. A31. (a) MPTC of Port1. (b) MPTC of Port2.

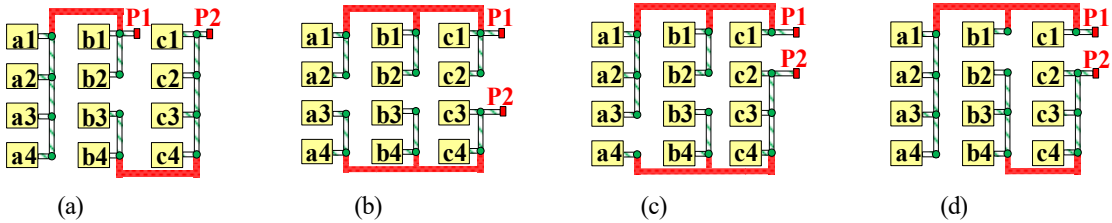

Fig. S33. IDBS-MPET of  $N(4)P(2)$ . (a)  $N(4)P(2)$ - $D(2)(4,2)$ . (b)  $N(4)P(2)$ - $T(2)(2,2,2)$ . (c)  $N(4)P(2)$ - $T(2)(3,2,1)$ . (d)  $N(4)P(2)$ - $D(1)(3,3)T(1)(4,1,1)$ .



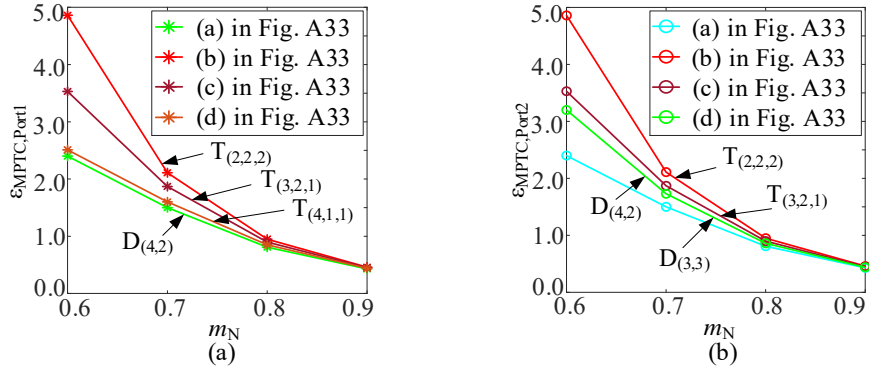

Fig. S34. MPTC of LVDC ports in MPETs shown in Fig. A33. (a) MPTC of Port1. (b) MPTC of Port2.

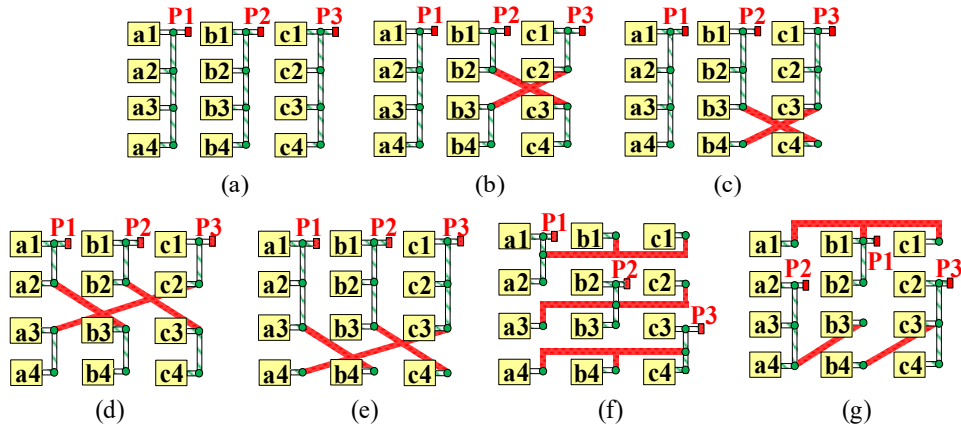

Fig. S35. IDBS-MPET of  $N_{(4)}P_{(3)}$ . (a)  $N_{(4)}P_{(3)}-S_{(3)(4)}$ . (b)  $N_{(4)}P_{(3)}-S_{(1)(4)}D_{(2)(2,2)}$ . (c)  $N_{(4)}P_{(3)}-S_{(1)(4)}D_{(2)(3,1)}$ . (d)  $N_{(4)}P_{(3)}-D_{(3)(2,2)}$ . (e)  $N_{(4)}P_{(3)}-D_{(3)(3,1)}$ . (f)  $N_{(4)}P_{(3)}-T_{(3)(2,1,1)}$ . (g)  $N_{(4)}P_{(3)}-D_{(2)(3,1)}T_{(1)(2,1,1)}$ .

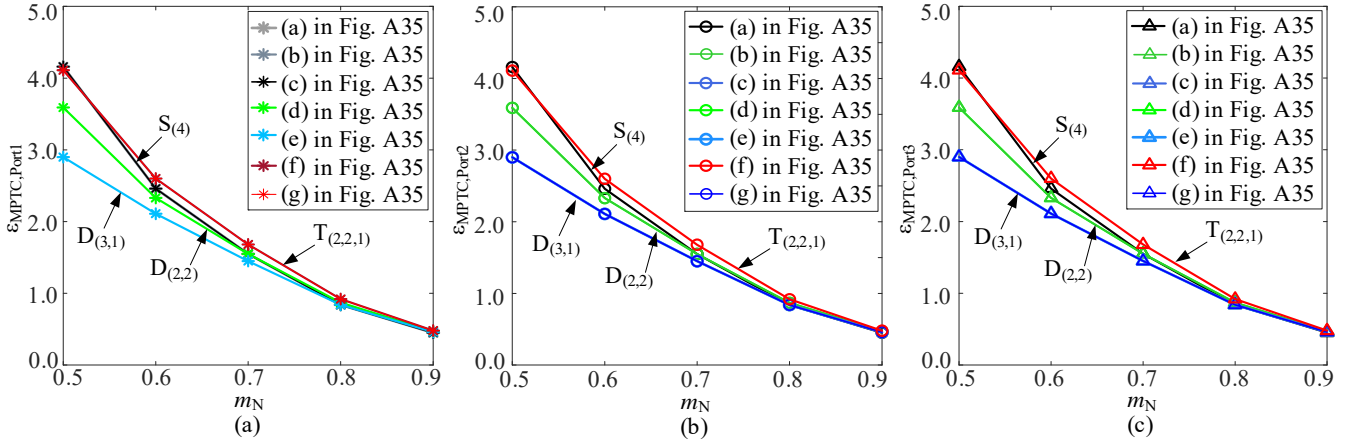

Fig. S36. MPTC of LVDC ports in MPETs shown in Fig. A35. (a) MPTC of Port1. (b) MPTC of Port2. (c) MPTC of Port3.

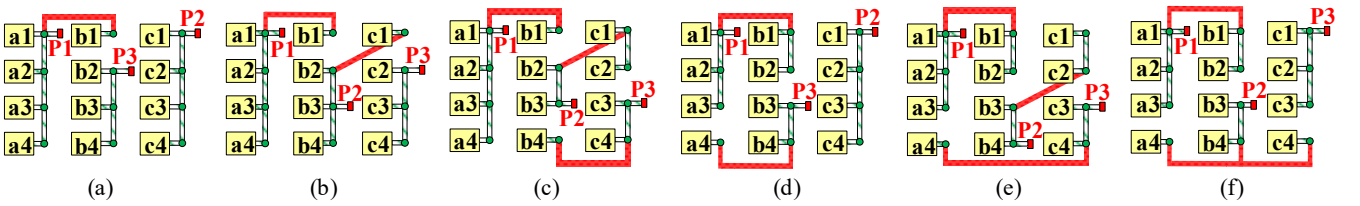

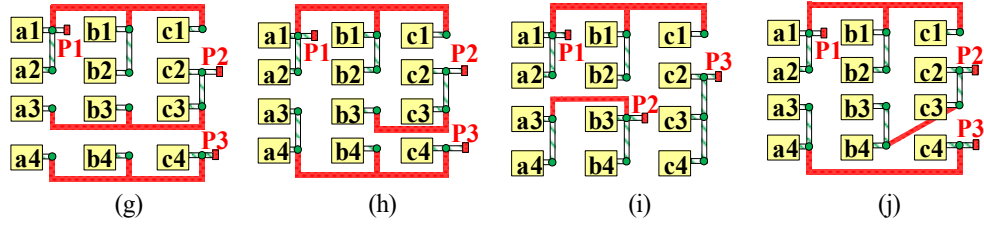

Fig. S37. IDBS-MPET of  $N(4)P(3)$ . (a)  $N(4)P(3)$ - $S(1)(3)S(1)(3)D(1)(4,1)$ . (b)  $N(4)P(3)$ - $S(1)(3)D(1)(4,1)D(1)(3,1)$ . (c)  $N(4)P(3)$ - $D(1)(4,1)D(1)(2,2)D(1)(2,1)$ . (d)  $N(4)P(3)$ - $S(1)(4)D(1)(3,2)D(1)(2,1)$ . (e)  $N(4)P(3)$ - $D(1)(3,2)D(1)(2,2)D(1)(2,1)$ . (f)  $N(4)P(3)$ - $S(1)(3)D(1)(3,2)T(1)(2,1,1)$ . (g)  $N(4)P(3)$ - $T(1)(2,2,1)T(1)(2,1,1)T(1)(1,1,1)$ . (h)  $N(4)P(3)$ - $D(1)(2,1)T(1)(2,2,1)T(1)(2,1,1)$ . (i)  $N(4)P(3)$ - $S(1)(3)D(1)(2,2)T(1)(2,2,1)$ . (j)  $N(4)P(3)$ - $D(1)(2,1)D(1)(2,2)T(1)(2,1,1)$ .

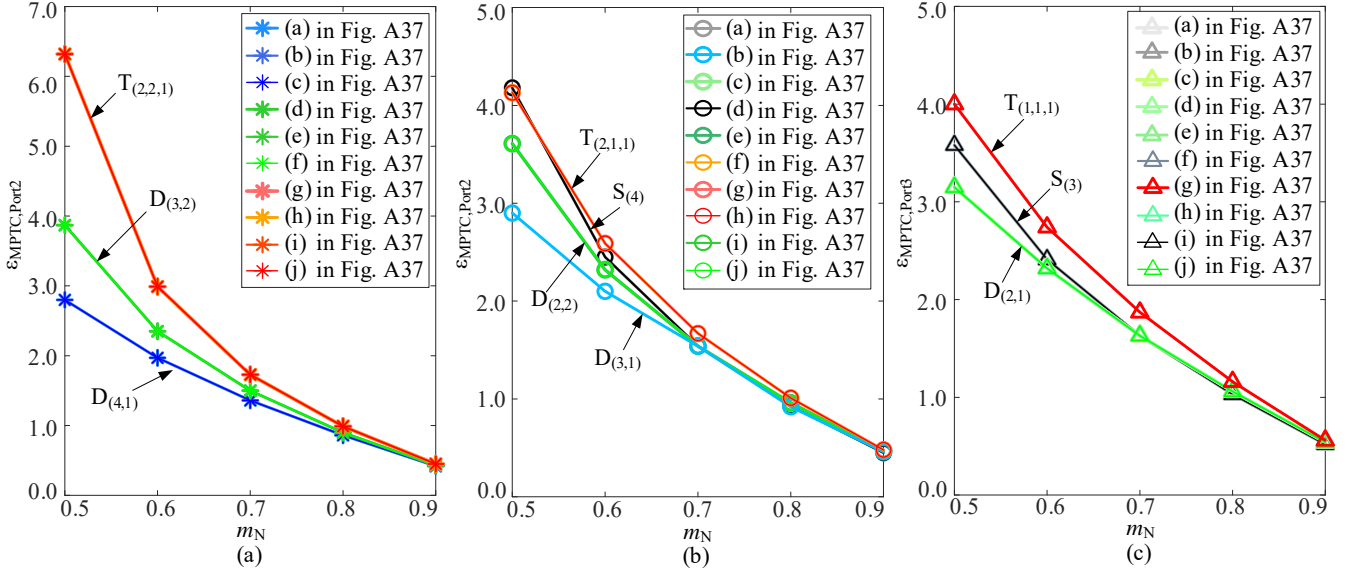

Fig. S38. MPTC of LVDC ports in MPETs shown in Fig. A37. (a) MPTC of Port1. (b) MPTC of Port2. (c) MPTC of Port3.

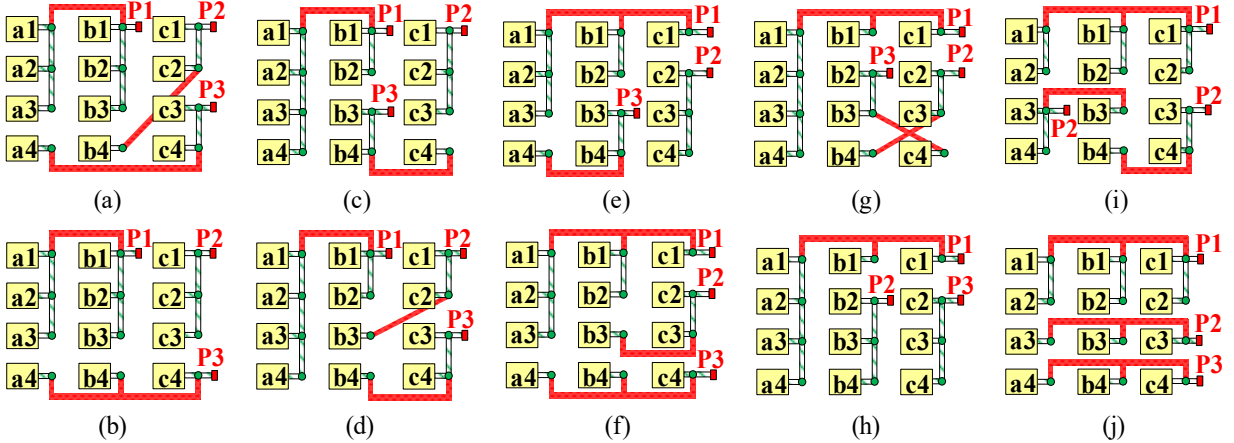

Fig. S39. IDBS-MPET of  $N(4)P(3)$ . (a)  $N(4)P(3)$ - $D(1)(3,3)D(1)(2,1)$ . (b)  $N(4)P(3)$ - $S(1)(3)D(1)(3,3)T(1)(1,1,1)$ . (c)  $N(4)P(3)$ - $S(1)(3)D(1)(4,2)D(1)(2,1)$ . (d)  $N(4)P(3)$ - $D(1)(4,2)D(2)(2,1)$ . (e)  $N(4)P(3)$ - $S(1)(3)D(1)(2,1)T(1)(3,2,1)$ . (f)  $N(4)P(3)$ - $D(1)(2,1)T(1)(3,2,1)T(1)(1,1,1)$ . (g)  $N(4)P(3)$ - $D(2)(2,1)T(1)(4,1,1)$ . (h)  $N(4)P(3)$ - $S(2)(3)T(1)(4,1,1)$ . (i)  $N(4)P(3)$ - $D(2)(2,1)T(1)(2,2,2)$ . (j)  $N(4)P(3)$ - $T(1)(2,2,2)T(2)(1,1,1)$ .

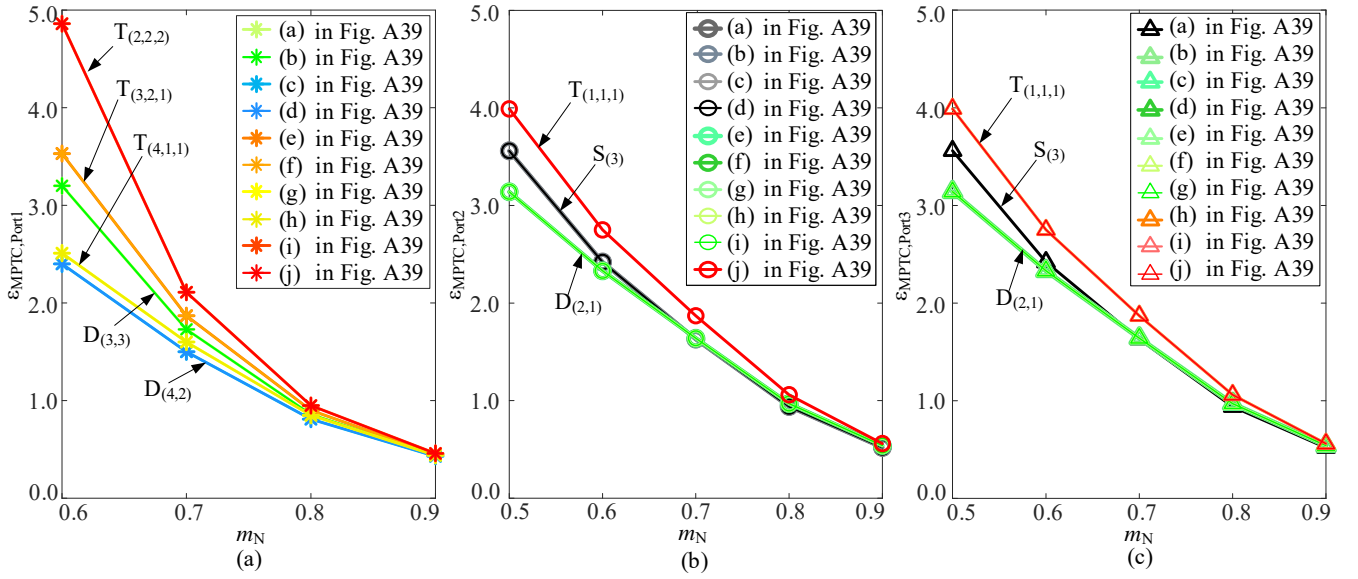

Fig. S40. MPTC of LVDC ports in MPETs shown in Fig. A39. (a) MPTC of Port1. (b) MPTC of Port2. (c) MPTC of Port3.

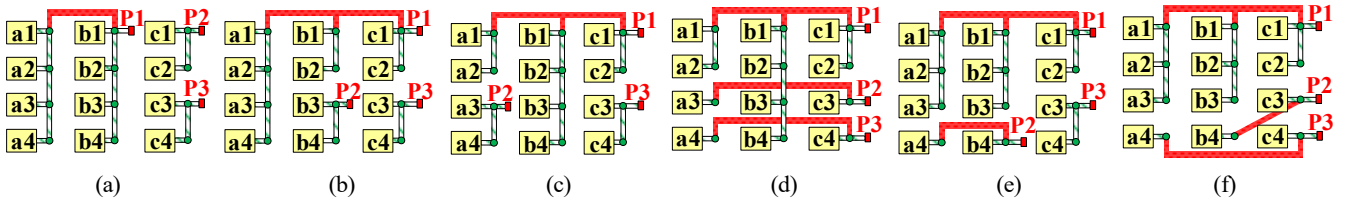

Fig. S41. IDBS-MPET of  $N(4)P(3)$ . (a)  $N(4)P(3)$ - $S(2)(2)D(1)(4,4)$ . (b)  $N(4)P(3)$ - $S(2)(2)T(1)(4,2,2)$ . (c)  $N(4)P(3)$ - $S(2)(2)T(1)(4,2,2)$ . (d)  $N(4)P(3)$ - $T(1)(4,2,2)D(1)(2,2)$ . (e)  $N(4)P(3)$ - $S(1)(2)D(1)(1,1)T(1)(3,3,2)$ . (f)  $N(4)P(3)$ - $D(2)(1,1)T(1)(3,3,2)$ .

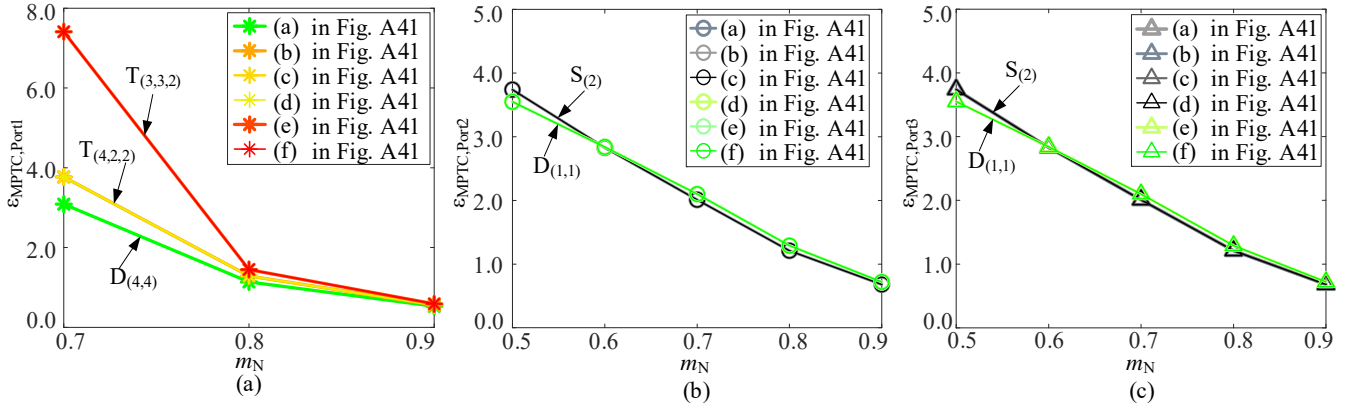

Fig. S42. MPTC of LVDC ports in MPETs shown in Fig. A41. (a) MPTC of Port1. (b) MPTC of Port2. (c) MPTC of Port3.

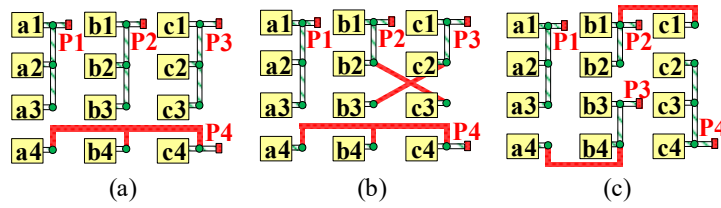

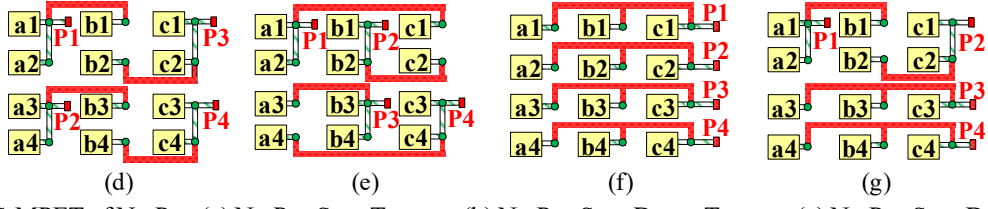

Fig. S43. IDBS-MPET of  $N(4)P(4)$ . (a)  $N(4)P(4)$ - $S(3)(3)T(3)(1,1,1)$ . (b)  $N(4)P(4)$ - $S(1)(3)D(2)(2,1)T(1)(1,1,1)$ . (c)  $N(4)P(4)$ - $S(2)(3)D(2)(2,1)$ . (d)  $N(4)P(4)$ - $D(4)(2,1)$ . (e)  $N(4)P(4)$ - $D(4)(2,1)$ . (f)  $N(4)P(4)$ - $T(4)(1,1,1)$ . (g)  $N(4)P(4)$ - $D(2)(2,1)T(2)(1,1,1)$ .

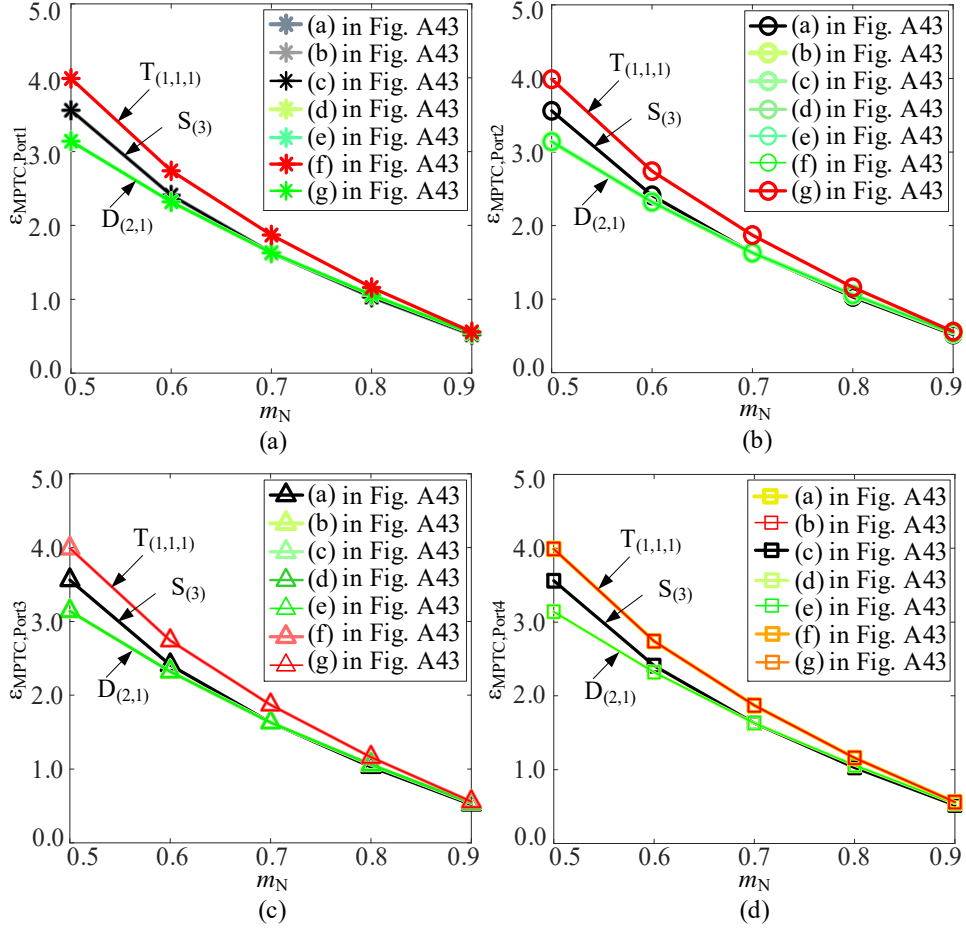

Fig. S44. MPTC of LVDC ports in MPETs shown in Fig. A43. (a) MPTC of Port1. (b) MPTC of Port2. (c) MPTC of Port3. (d) MPTC of Port4.

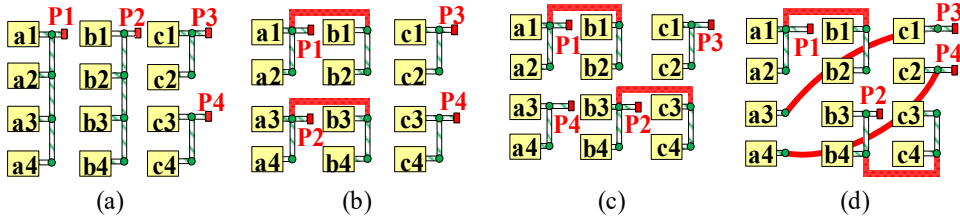

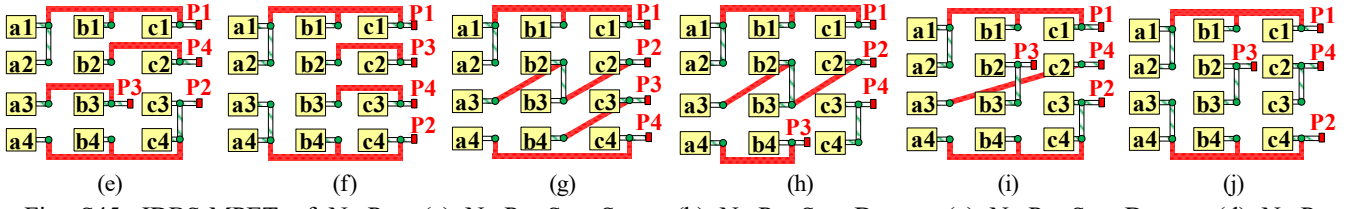

Fig. S45. IDBS-MPET of  $N_{(4)}P_{(4)}$ . (a)  $N_{(4)}P_{(4)}-S_{(2)(2)}S_{(2)(4)}$ . (b)  $N_{(4)}P_{(4)}-S_{(2)(2)}D_{(2)(2,2)}$ . (c)  $N_{(4)}P_{(4)}-S_{(2)(2)}D_{(2)(2,2)}$ . (d)  $N_{(4)}P_{(4)}-D_{(2)(1,1)}D_{(2)(2,2)}$ . (e)  $N_{(4)}P_{(4)}-D_{(2)(1,1)}T_{(2)(2,1,1)}$ . (f)  $N_{(4)}P_{(4)}-D_{(2)(1,1)}T_{(2)(2,1,1)}$ . (g)  $N_{(4)}P_{(4)}-D_{(2)(1,1)}T_{(2)(2,1,1)}$ . (h)  $N_{(4)}P_{(4)}-S_{(1)(2)}D_{(1)(1,1)}T_{(2)(2,1,1)}$ . (i)  $N_{(4)}P_{(4)}-S_{(1)(2)}D_{(1)(1,1)}T_{(2)(2,1,1)}$ . (j)  $N_{(4)}P_{(4)}-S_{(2)(2)}T_{(2)(2,1,1)}$ .

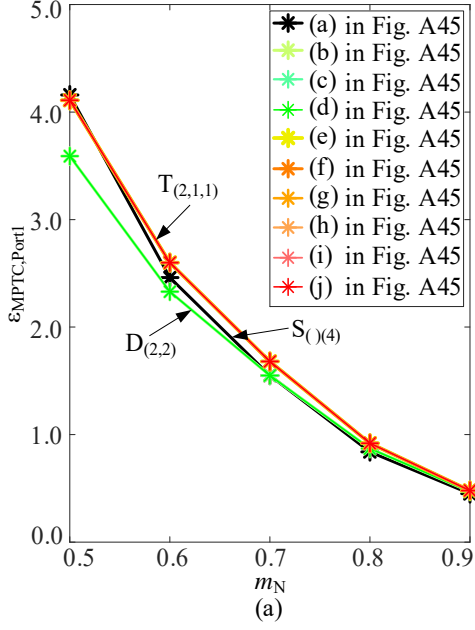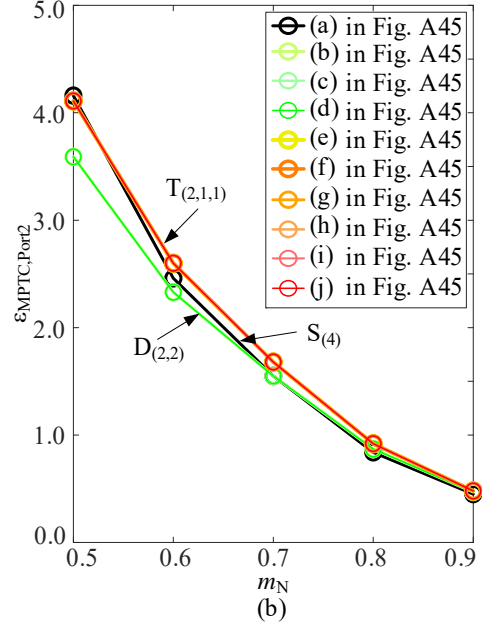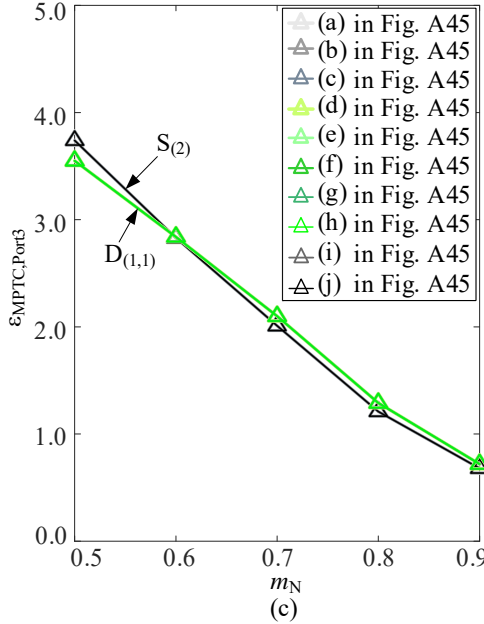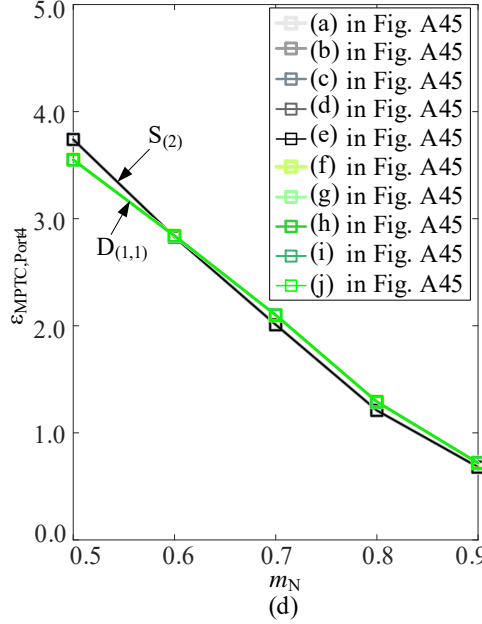

Fig. S46. MPTC of LVDC ports in MPETs shown in Fig. A45. (a) MPTC of Port1. (b) MPTC of Port2. (c) MPTC of Port3. (d) MPTC of Port4.

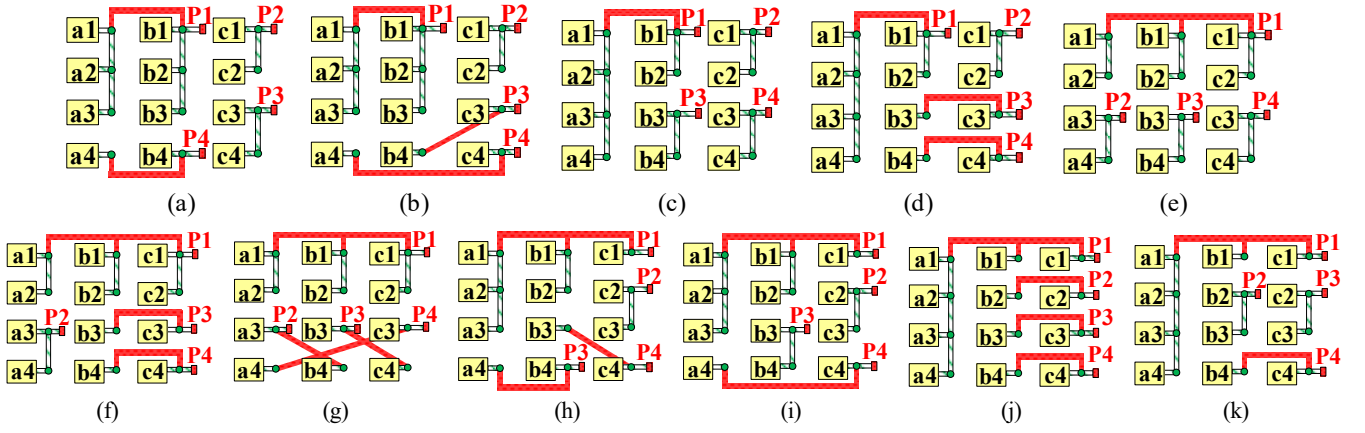

Fig. S47. IDBS-MPET of  $N_4P_4$ . (a)  $N_4P_4-S_{(2)(2)}D_{(1)(3,3)}D_{(1)(1,1)}$ . (b)  $N_4P_4-S_{(1)(2)}D_{(1)(3,3)}D_{(2)(1,1)}$ . (c)  $N_4P_4-S_{(3)(2)}D_{(1)(4,2)}$ . (d)  $N_4P_4-S_{(1)(2)}D_{(1)(4,2)}D_{(2)(1,1)}$ . (e)  $N_4P_4-S_{(3)(2)}T_{(1)(2,2,2)}$ . (f)  $N_4P_4-S_{(1)(2)}D_{(2)(1,1)}T_{(1)(2,2,2)}$ . (g)  $N_4P_4-D_{(3)(1,1)}T_{(1)(2,2,2)}$ . (h)  $N_4P_4-S_{(1)(2)}D_{(2)(1,1)}T_{(1)(3,2,1)}$ . (i)  $N_4P_4-S_{(2)(2)}D_{(1)(1,1)}T_{(1)(3,2,1)}$ . (j)  $N_4P_4-D_{(3)(1,1)}T_{(1)(4,1,1)}$ . (k)  $N_4P_4-S_{(2)(2)}D_{(1)(1,1)}T_{(1)(4,1,1)}$ .

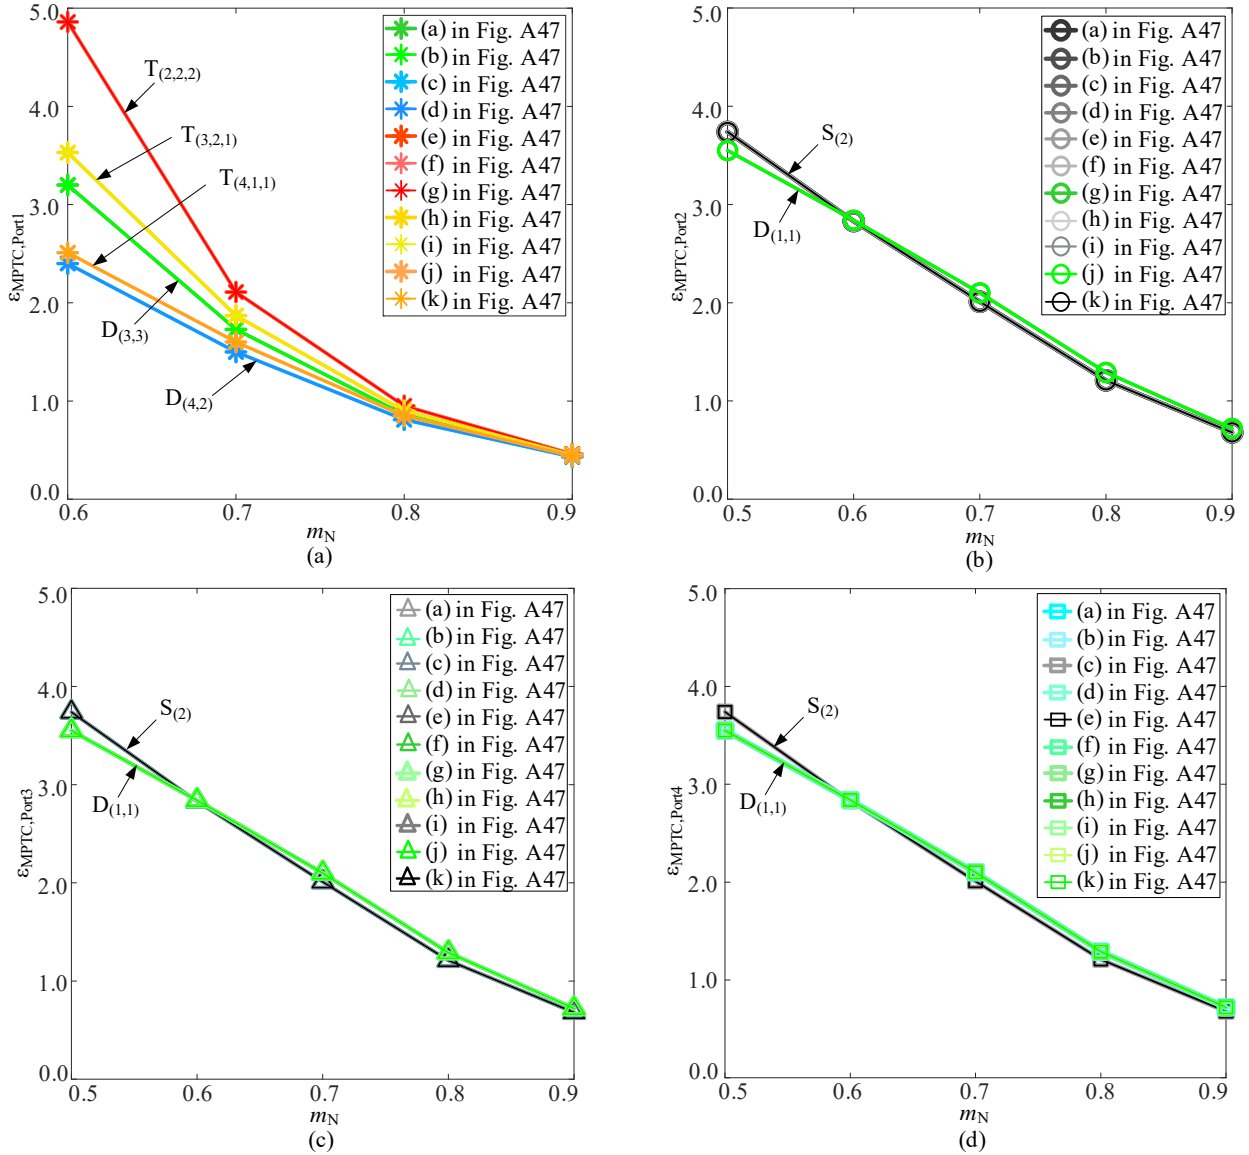

Fig. S48. MPTC of LVDC ports in MPETs shown in Fig. A47. (a) MPTC of Port1. (b) MPTC of Port2. (c) MPTC of Port3. (d) MPTC of Port4.
